# Supplementary material for: Enhancing the stability of kinesin motors for microscale transport applications
Source: Royal Society of Chemistry journal article supplement (doi:10.1039/b714989a), 2007-12-06
Supplement: b714989a.pdf [file b714989a.pdf]

**Supplementary Information**

Movie1: Microtubule motility on critical point-dried motors stored for 20 weeks.  
(10x actual speed)

Movie2: Microtubule motility on freeze-dried motors stored for 20 weeks. (10x  
actual speed)

Movie3: Microtubule motility on patterned critical point-dried motors (10x actual  
speed)
